# Supplementary material for: A Solid-State Wire-Shaped Supercapacitor Based on Nylon/Ag/Polypyrrole and Nylon/Ag/MnO2 Electrodes
Source: MDPI journal article supplement (doi:10.3390/polym15071627), 2023-03-24
Supplement: s1 [file s1]

# **A solid-state wire-shaped supercapacitor based on nylon/Ag/polypyrrole and nylon/Ag/MnO<sub>2</sub> electrodes**

Ruirong Zhang <sup>1,\*</sup>, Xiangao Wang <sup>1</sup>, Sheng Cai <sup>1</sup>, Kai Tao <sup>1</sup> and Yanmeng Xu <sup>2</sup>

<sup>1</sup> Ministry of Education Key Laboratory of Micro/Nano Systems for Aerospace, School of Mechanical Engineering, Northwestern Polytechnical University, Xi'an 710072, China

<sup>2</sup> Cleaner Electronics Group, College of Engineering, Design and Physical Sciences, Brunel University London, Uxbridge UB8 3PH, UK

\*E-mail: [ruirongzhang@nwpu.edu.cn](mailto:ruirongzhang@nwpu.edu.cn)

## Supplementary Figures

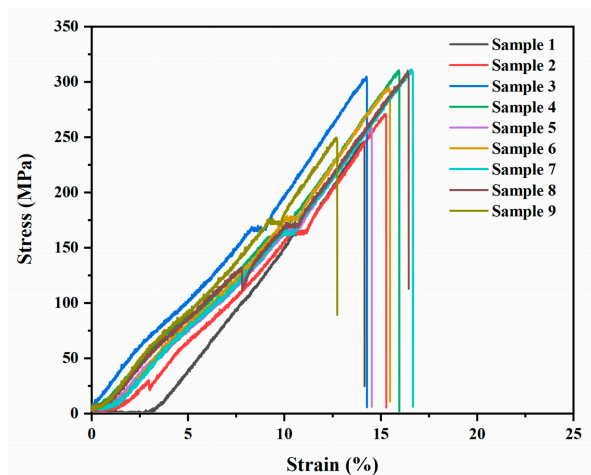

**Figure S1.** The stress-strain curves of nylon samples

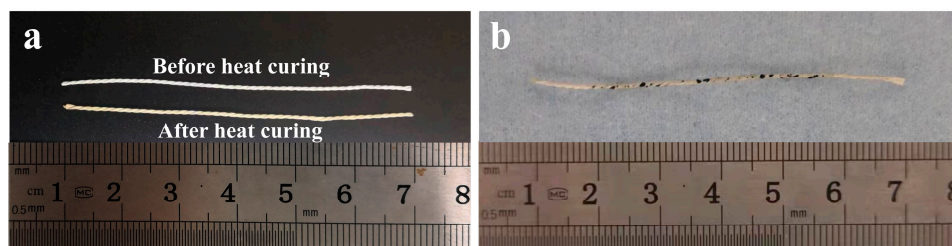

**Figure S2.** (a) Optical picture of the comparison of the nylon/Ag substrate before and after heat curing; (b) Optical picture of the electrode fabricated via directly electrochemically polymerizing PPy on nylon/Ag.

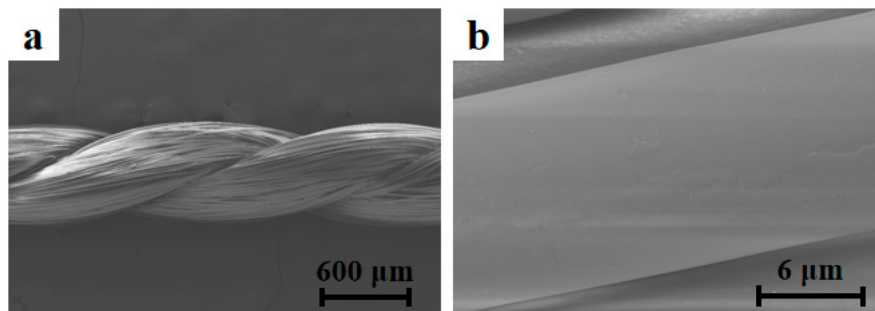

**Figure S3.** SEM images of the nylon yarn: (a) 40 $\times$  magnification; (b) 3000 $\times$  magnification.

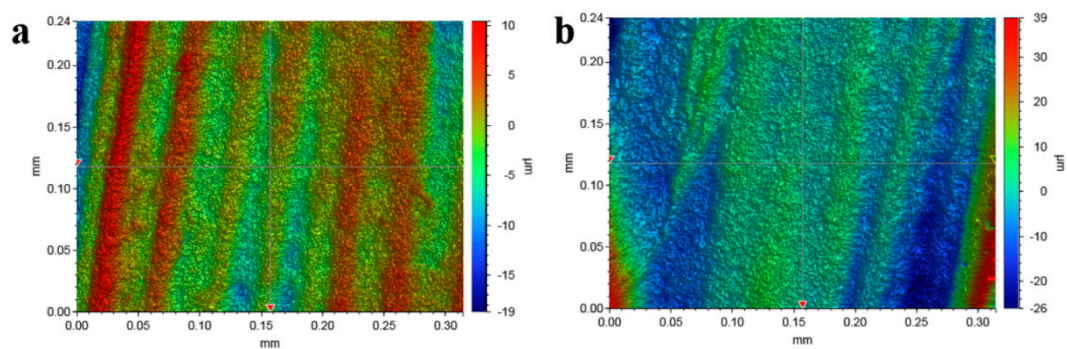

**Figure S4.** 3D profiles of (a) the nylon/Ag yarn and (b) the nylon/Ag/PPy yarn after chemical polymerization.

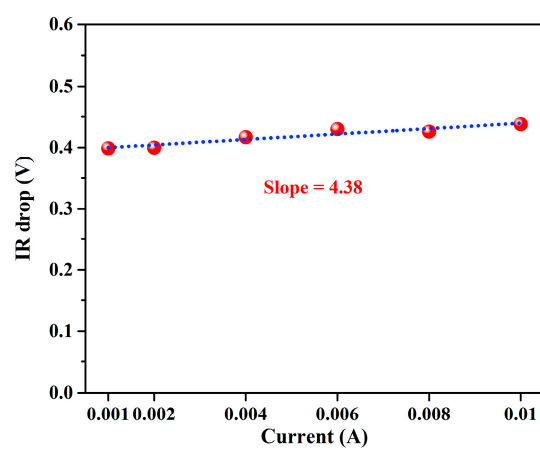

**Figure S5.** Variation of IR drop with different discharge currents of nylon/Ag/MnO<sub>2</sub> electrode.
